# Supplementary material for: Rapid determination of 54 dye components in hair dyes by liquid chromatography coupled to quadrupole orbitrap high-resolution mass spectrometry
Source: Royal Society of Chemistry journal article supplement (doi:10.1039/d4ay00981a), 2024-01-01
Supplement: d4ay00981a1.pdf [file d4ay00981a1.pdf]

## Supplementary information

**Table S1** Mass spectrum information and chromatographic information of 54 dye components

| Compound ID | Retention time (min) | Formula                                                       | Adduct | Normalized collision energy | Fragment ions (m/z)                                                |
|-------------|----------------------|---------------------------------------------------------------|--------|-----------------------------|--------------------------------------------------------------------|
| A01         | 1.21                 | C <sub>5</sub> H <sub>10</sub> N <sub>4</sub> O               | M+H    | 50%                         | 45.0335, 55.0291, 72.0444, 82.0400, 108.0556, 99.0553, 126.0662    |
| A02         | 1.52                 | C <sub>8</sub> H <sub>12</sub> N <sub>2</sub> O               | M+H    | 50%                         | 91.0542, 118.0651, 135.0917                                        |
| A03         | 1.37                 | C <sub>4</sub> H <sub>8</sub> N <sub>6</sub>                  | M+H    | 70%                         | 55.0291, 72.0556, 82.0400, 99.0665                                 |
| A04         | 5.72                 | C <sub>11</sub> H <sub>18</sub> N <sub>2</sub> O <sub>2</sub> | M+H    | 70%                         | 122.0839, 135.0917, 147.0917                                       |
| A05         | 6.43                 | C <sub>6</sub> H <sub>5</sub> ClN <sub>2</sub> O <sub>3</sub> | M-H    | 70%                         | 45.9935, 50.0036, 76.0193, 93.0220, 134.0122, 120.0091, 156.9936   |
| A06         | 6.41                 | C <sub>9</sub> H <sub>13</sub> NO <sub>2</sub>                | M+H    | 70%                         | 45.0335, 79.0542, 108.0570, 123.0679, 150.0913, 135.0679           |
| A07         | 6.10                 | C <sub>8</sub> H <sub>10</sub> N <sub>2</sub> O <sub>4</sub>  | M-H    | 70%                         | 94.0298, 122.0248, 132.0329                                        |
| A08         | 6.83                 | C <sub>9</sub> H <sub>12</sub> N <sub>2</sub> O <sub>4</sub>  | M+H    | 70%                         | 80.0495, 91.0291, 96.0444, 96.0444, 148.0631, 109.0522, 161.0709   |
| A09         | 8.63                 | C <sub>7</sub> H <sub>8</sub> ClNO                            | M+H    | 70%                         | 55.0542, 68.0131, 77.0386, 95.0491, 143.0132, 122.0600             |
| A10         | 7.56                 | C <sub>7</sub> H <sub>8</sub> ClNO                            | M+H    | 70%                         | 77.0386, 104.0495, 123.0679, 140.0262                              |
| A11         | 8.25                 | C <sub>8</sub> H <sub>10</sub> N <sub>2</sub> O <sub>3</sub>  | M+H    | 50%                         | 65.0386, 92.0495, 107.0604, 119.0604, 165.0659, 147.0553           |
| A12         | 4.90                 | C <sub>8</sub> H <sub>9</sub> NO <sub>2</sub>                 | M+H    | 50%                         | 109.0284, 124.0393                                                 |
| A13         | 9.20                 | C <sub>9</sub> H <sub>12</sub> N <sub>2</sub> O <sub>3</sub>  | M+H    | 50%                         | 79.0542, 94.0651, 106.0651, 121.0760, 149.0709, 135.0553, 161.0709 |
| A14         | 6.55                 | C <sub>15</sub> H <sub>20</sub> N <sub>4</sub> O <sub>2</sub> | M+H    | 50%                         | 123.0553, 137.0709, 165.1022                                       |
| A15         | 6.46                 | C <sub>7</sub> H <sub>11</sub> N <sub>3</sub> O <sub>2</sub>  | M+H    | 70%                         | 112.0505, 140.0455                                                 |
| A16         | 4.19                 | C <sub>9</sub> H <sub>14</sub> N <sub>2</sub> O <sub>2</sub>  | M+H    | 50%                         | 123.0553, 138.0788, 150.0788                                       |
| A17         | 7.12                 | C <sub>6</sub> H <sub>6</sub> O                               | M-H    | 70%                         | 65.0397                                                            |
| A18         | 6.68                 | C <sub>9</sub> H <sub>11</sub> NO <sub>3</sub>                | M+H    | 70%                         | 79.0542, 106.0651, 124.0757, 137.0471                              |
| A19         | 7.27                 | C <sub>10</sub> H <sub>14</sub> N <sub>2</sub> O <sub>5</sub> | M+H    | 70%                         | 77.0386, 105.0447, 141.0573, 168.0682, 196.0631                    |
| A20         | 10.65                | C <sub>12</sub> H <sub>11</sub> N <sub>3</sub> O <sub>2</sub> | M+H    | 70%                         | 65.0386, 92.0495, 117.0573, 154.0651, 195.0791, 183.0917           |
| A21         | 10.52                | C <sub>12</sub> H <sub>10</sub> N <sub>2</sub> O <sub>3</sub> | M+H    | 70%                         | 77.0386, 105.0447, 141.0573, 168.0682, 196.0631                    |
| A22         | 9.56                 | C <sub>14</sub> H <sub>10</sub> N <sub>2</sub> O <sub>2</sub> | M+H    | 100%                        | 77.0386, 105.0335, 129.0699, 139.0542, 192.0682, 166.0651          |

|            |      |                                                               |     |      |                                                |
|------------|------|---------------------------------------------------------------|-----|------|------------------------------------------------|
| S01        | 1.54 | C <sub>6</sub> H <sub>8</sub> N <sub>2</sub>                  | M+H | 70%  | 65.0386, 92.0495                               |
| S02        | 1.78 | C <sub>6</sub> H <sub>7</sub> NO                              | M+H | 70%  | 66.0338, 93.0335                               |
| S03        | 1.88 | C <sub>7</sub> H <sub>10</sub> N <sub>2</sub>                 | M+H | 100% | 79.0542, 95.0604, 108.0682                     |
| S04        | 2.68 | C <sub>6</sub> H <sub>7</sub> NO                              | M+H | 70%  | 65.0386, 82.0651, 93.0335                      |
| S05        | 3.51 | C <sub>6</sub> H <sub>8</sub> N <sub>2</sub>                  | M+H | 70%  | 65.0386, 92.0495                               |
| S06        | 3.72 | C <sub>6</sub> H <sub>7</sub> ClN <sub>2</sub>                | M+H | 70%  | 80.0495, 108.0682                              |
| S07        | 3.92 | C <sub>6</sub> H <sub>7</sub> NO                              | M+H | 70%  | 65.0386, 92.0495                               |
| S08        | 3.57 | C <sub>6</sub> H <sub>6</sub> O <sub>2</sub>                  | M-H | 70%  | 81.0346                                        |
| S09        | 4.36 | C <sub>6</sub> H <sub>7</sub> N <sub>3</sub> O <sub>2</sub>   | M+H | 70%  | 81.0533, 91.0417, 108.0682, 119.0478           |
| S10        | 6.11 | C <sub>7</sub> H <sub>10</sub> N <sub>2</sub>                 | M+H | 100% | 79.0542, 95.0604, 106.0651                     |
| S11        | 5.79 | C <sub>7</sub> H <sub>9</sub> NO                              | M+H | 70%  | 79.0542, 95.0491, 109.0522                     |
| S12        | 4.08 | C <sub>7</sub> H <sub>8</sub> O <sub>2</sub>                  | M-H | 70%  | 55.0189, 67.0189, 79.0553                      |
| S13        | 6.36 | C <sub>7</sub> H <sub>9</sub> NO                              | M+H | 70%  | 79.0542, 95.0491, 106.0651                     |
| S14        | 7.06 | C <sub>10</sub> H <sub>10</sub> N <sub>2</sub> O              | M+H | 70%  | 54.0338, 65.0386, 118.0651, 106.0651, 133.0760 |
| S15        | 4.90 | C <sub>11</sub> H <sub>18</sub> N <sub>2</sub>                | M+H | 70%  | 121.0760, 135.0917, 150.1152                   |
| S16        | 5.86 | C <sub>6</sub> H <sub>6</sub> N <sub>2</sub> O <sub>3</sub>   | M-H | 70%  | 45.9935, 64.0067, 78.0349, 122.0248            |
| S17        | 2.17 | C <sub>6</sub> H <sub>8</sub> N <sub>2</sub>                  | M+H | 70%  | 65.0386, 92.0495                               |
| S18        | 1.84 | C <sub>8</sub> H <sub>12</sub> N <sub>2</sub> O <sub>2</sub>  | M+H | 70%  | 123.0553, 124.0631, 125.0709                   |
| S19        | 2.19 | C <sub>6</sub> H <sub>6</sub> O <sub>2</sub>                  | M-H | 70%  | 65.0397, 67.0189                               |
| S20        | 2.46 | C <sub>7</sub> H <sub>9</sub> NO                              | M+H | 70%  | 79.0542, 95.0491, 105.0335, 109.0522           |
| S21        | 1.55 | C <sub>5</sub> H <sub>6</sub> N <sub>2</sub> O                | M+H | 100% | 56.0495, 66.0338, 84.0444, 93.0335             |
| S22        | 1.92 | C <sub>10</sub> H <sub>16</sub> N <sub>2</sub> O <sub>2</sub> | M+H | 70%  | 121.0760, 134.0839, 152.0944                   |
| S23        | 3.00 | C <sub>7</sub> H <sub>9</sub> NO                              | M+H | 70%  | 109.0522                                       |
| S24        | 6.12 | C <sub>6</sub> H <sub>7</sub> N <sub>3</sub> O <sub>2</sub>   | M+H | 70%  | 91.0417, 108.0682                              |
| S25        | 1.88 | C <sub>5</sub> H <sub>7</sub> N <sub>3</sub>                  | M+H | 100% | 56.0495, 66.0338, 93.0447                      |
| S26        | 3.34 | C <sub>10</sub> H <sub>16</sub> N <sub>2</sub>                | M+H | 70%  | 121.0760, 136.0995                             |
| S27        | 7.31 | C <sub>8</sub> H <sub>7</sub> NO                              | M-H | 30%  | 104.0506                                       |
| <b>S28</b> | 7.22 | C <sub>6</sub> H <sub>5</sub> ClO <sub>2</sub>                | M-H | 50%  | 69.0346, 79.0189, 97.0295, 107.0139            |
| S29        | 7.68 | C <sub>10</sub> H <sub>8</sub> O <sub>2</sub>                 | M-H | 70%  | 103.0553, 130.0424                             |

|     |       |                   |     |      |                                      |
|-----|-------|-------------------|-----|------|--------------------------------------|
| S30 | 9.67  | $C_{12}H_{12}N_2$ | M+H | 70%  | 65.0386, 93.0573, 108.0682, 167.0730 |
| S31 | 7.48  | $C_{10}H_8O_2$    | M-H | 70%  | 103.0553, 115.0553, 131.0502         |
| S32 | 10.05 | $C_{10}H_8O$      | M-H | 100% | 101.0397, 115.0553                   |

---

**Table S2** The Scan mode, expected  $m/z$ , linear range, linear equation, correlation coefficient, detection limit and quantitative limit of 54 dye components

| Compound ID | Scan mode | $m/z$ (Expected) | Linear range (ng/mL) | Equation                                      | $r$    | LOD ( $\mu\text{g/mL}$ ) | LOQ ( $\mu\text{g/mL}$ ) | LOD* ( $\mu\text{g/g}$ ) | LOQ* ( $\mu\text{g/g}$ ) |
|-------------|-----------|------------------|----------------------|-----------------------------------------------|--------|--------------------------|--------------------------|--------------------------|--------------------------|
| A01         | ESI+      | 143.09274        | 8-800                | $y = 2.256 \times 10^5 x + 1.458 \times 10^6$ | 0.9995 | 0.2                      | 0.4                      | 0.5                      | 1.7                      |
| A02         | ESI+      | 153.10224        | 8-800                | $y = 7.045 \times 10^5 x + 1.876 \times 10^7$ | 0.9991 | 0.7                      | 2.3                      | 1.8                      | 5.8                      |
| A03         | ESI+      | 141.08832        | 8-800                | $y = 4.539 \times 10^4 x - 1.285 \times 10^5$ | 0.9996 | 0.2                      | 0.5                      | 0.5                      | 1.7                      |
| A04         | ESI+      | 211.14410        | 8-800                | $y = 5.065 \times 10^5 x + 5.626 \times 10^6$ | 0.9988 | 0.1                      | 0.2                      | 0.3                      | 0.8                      |
| A05         | ESI-      | 186.99159        | 8-2000               | $y = 3.534 \times 10^5 x - 1.375 \times 10^6$ | 0.9999 | 0.9                      | 3.0                      | 2.3                      | 7.5                      |
| A06         | ESI+      | 168.10191        | 8-800                | $y = 2.277 \times 10^5 x + 3.075 \times 10^6$ | 0.9984 | 0.2                      | 0.4                      | 0.5                      | 1.7                      |
| A07         | ESI-      | 197.05678        | 8-2000               | $y = 6.934 \times 10^4 x - 5.282 \times 10^5$ | 0.9997 | 0.1                      | 0.2                      | 0.3                      | 0.8                      |
| A08         | ESI+      | 213.08698        | 8-800                | $y = 2.370 \times 10^5 x + 5.004 \times 10^6$ | 0.9969 | 0.1                      | 0.2                      | 0.3                      | 0.8                      |
| A09         | ESI+      | 158.03672        | 8-2000               | $y = 4.256 \times 10^3 x - 4.301 \times 10^4$ | 0.9998 | 0.2                      | 0.5                      | 0.5                      | 1.7                      |
| A10         | ESI+      | 158.03672        | 20-2000              | $y = 2.073 \times 10^3 x - 1.771 \times 10^4$ | 0.9999 | 5.7                      | 19                       | 14                       | 48                       |
| A11         | ESI+      | 183.07642        | 8-2000               | $y = 4.620 \times 10^4 x - 2.354 \times 10^5$ | 0.9998 | 0.3                      | 1.0                      | 0.8                      | 2.5                      |
| A12         | ESI+      | 152.07061        | 8-2000               | $y = 6.074 \times 10^4 x - 1.344 \times 10^6$ | 0.9996 | 1.8                      | 5.8                      | 4.5                      | 15                       |
| A13         | ESI+      | 197.09207        | 8-2000               | $y = 1.518 \times 10^5 x - 6.496 \times 10^4$ | 0.9999 | 1.6                      | 5.4                      | 4.0                      | 13                       |
| A14         | ESI+      | 289.16590        | 40-2000              | $y = 5.905 \times 10^3 x - 2.327 \times 10^4$ | 1.0000 | 12                       | 41                       | 30                       | 99                       |
| A15         | ESI+      | 170.09240        | 8-2000               | $y = 5.198 \times 10^4 x - 8.069 \times 10^5$ | 0.9998 | 0.4                      | 1.3                      | 1.0                      | 3.3                      |
| A16         | ESI+      | 183.11280        | 8-800                | $y = 4.206 \times 10^4 x - 2.433 \times 10^4$ | 0.9989 | 2.4                      | 8.0                      | 6.0                      | 20                       |
| A17         | ESI-      | 93.03459         | 20-2000              | $y = 1.517 \times 10^4 x + 3.106 \times 10^5$ | 0.9999 | 6.7                      | 22                       | 17                       | 56                       |
| A18         | ESI+      | 182.08117        | 8-2000               | $y = 1.339 \times 10^5 x + 5.256 \times 10^5$ | 0.9997 | 0.3                      | 0.8                      | 0.8                      | 2.5                      |
| A21         | ESI+      | 243.09755        | 8-800                | $y = 2.970 \times 10^5 x + 2.625 \times 10^6$ | 0.9988 | 0.1                      | 0.2                      | 0.3                      | 0.8                      |
| A22         | ESI+      | 230.09240        | 8-800                | $y = 1.044 \times 10^5 x + 2.346 \times 10^5$ | 0.9999 | 0.3                      | 0.8                      | 0.8                      | 2.5                      |

|     |      |           |         |                                               |        |      |     |     |     |
|-----|------|-----------|---------|-----------------------------------------------|--------|------|-----|-----|-----|
| A23 | ESI+ | 231.07642 | 20-2000 | $y = 7.083 \times 10^3 x - 1.521 \times 10^4$ | 0.9999 | 3.7  | 12  | 9.3 | 31  |
| A24 | ESI+ | 239.08150 | 8-2000  | $y = 2.994 \times 10^5 x + 6.972 \times 10^6$ | 0.9996 | 0.6  | 1.8 | 1.5 | 5.0 |
| S01 | ESI+ | 109.07602 | 8-800   | $y = 1.624 \times 10^5 x + 3.039 \times 10^6$ | 0.9990 | 1.7  | 5.5 | 4.3 | 14  |
| S02 | ESI+ | 110.06004 | 8-800   | $y = 3.941 \times 10^4 x - 4.794 \times 10^4$ | 0.9999 | 1.4  | 4.6 | 3.5 | 12  |
| S03 | ESI+ | 123.09167 | 8-800   | $y = 1.306 \times 10^5 x - 7.018 \times 10^5$ | 0.9996 | 0.2  | 0.6 | 0.5 | 1.7 |
| S04 | ESI+ | 110.06004 | 20-2000 | $y = 1.266 \times 10^4 x - 1.784 \times 10^4$ | 0.9999 | 5.8  | 19  | 15  | 48  |
| S05 | ESI+ | 109.07602 | 8-800   | $y = 8.494 \times 10^3 x - 9.382 \times 10^4$ | 0.9986 | 2.5  | 8.1 | 6.3 | 21  |
| S06 | ESI+ | 143.03705 | 20-2000 | $y = 1.365 \times 10^4 x - 7.796 \times 10^4$ | 1.0000 | 3.5  | 12  | 8.8 | 29  |
| S07 | ESI+ | 110.06004 | 20-2000 | $y = 2.747 \times 10^4 x - 2.210 \times 10^5$ | 0.9998 | 6.7  | 22  | 13  | 42  |
| S08 | ESI- | 109.02950 | 8-2000  | $y = 3.397 \times 10^4 x - 3.437 \times 10^5$ | 0.9999 | 1.6  | 5.4 | 4.0 | 13  |
| S09 | ESI+ | 154.06110 | 8-2000  | $y = 3.228 \times 10^4 x - 9.970 \times 10^4$ | 1.0000 | 1.5  | 4.8 | 3.8 | 13  |
| S10 | ESI+ | 123.09167 | 8-800   | $y = 1.647 \times 10^4 x - 1.110 \times 10^5$ | 0.9985 | 0.9  | 2.8 | 2.3 | 7.5 |
| S11 | ESI+ | 124.07569 | 8-800   | $y = 5.868 \times 10^4 x + 1.021 \times 10^6$ | 0.9978 | 0.8  | 2.6 | 2.0 | 6.7 |
| S12 | ESI- | 123.04515 | 8-2000  | $y = 3.354 \times 10^4 x + 2.913 \times 10^5$ | 0.9999 | 2.4  | 8.0 | 5.0 | 17  |
| S13 | ESI+ | 124.07569 | 8-2000  | $y = 1.123 \times 10^5 x + 2.501 \times 10^5$ | 0.9999 | 1.7  | 5.5 | 4.3 | 14  |
| S14 | ESI+ | 175.08659 | 8-800   | $y = 3.355 \times 10^5 x + 5.487 \times 10^5$ | 0.9999 | 1.2  | 4.0 | 3.0 | 10  |
| S15 | ESI+ | 179.15428 | 8-2000  | $y = 4.736 \times 10^5 x - 2.036 \times 10^6$ | 0.9997 | 0.6  | 2.0 | 1.5 | 5.0 |
| S16 | ESI- | 153.03057 | 8-2000  | $y = 6.290 \times 10^4 x + 1.862 \times 10^5$ | 0.9999 | 0.2  | 0.6 | 0.5 | 1.7 |
| S17 | ESI+ | 109.07602 | 8-2000  | $y = 2.556 \times 10^4 x - 1.003 \times 10^5$ | 0.9999 | 1.4  | 4.5 | 3.5 | 12  |
| S18 | ESI+ | 169.09715 | 8-800   | $y = 8.590 \times 10^4 x + 1.004 \times 10^6$ | 0.9985 | 0.2  | 0.7 | 0.5 | 1.7 |
| S19 | ESI- | 109.02950 | 80-8000 | $y = 4.681 \times 10^3 x + 2.003 \times 10^5$ | 0.9998 | 23.5 | 78  | 59  | 196 |
| S20 | ESI+ | 124.07569 | 8-2000  | $y = 7.221 \times 10^4 x - 6.638 \times 10^5$ | 0.9999 | 0.9  | 2.7 | 2.3 | 7.5 |
| S21 | ESI+ | 111.05529 | 8-2000  | $y = 7.045 \times 10^5 x + 1.876 \times 10^7$ | 0.9991 | 1.8  | 6.0 | 4.5 | 15  |
| S22 | ESI+ | 197.12845 | 8-2000  | $y = 1.909 \times 10^5 x + 2.931 \times 10^6$ | 0.9997 | 0.1  | 0.4 | 0.3 | 0.8 |
| S23 | ESI+ | 124.07569 | 8-800   | $y = 3.060 \times 10^5 x + 7.788 \times 10^5$ | 0.9998 | 0.3  | 0.8 | 0.8 | 2.5 |
| S24 | ESI+ | 154.06110 | 8-800   | $y = 4.941 \times 10^4 x + 1.317 \times 10^5$ | 0.9998 | 0.5  | 1.5 | 1.3 | 4.2 |

|     |      |           |        |                                               |        |     |     |     |     |
|-----|------|-----------|--------|-----------------------------------------------|--------|-----|-----|-----|-----|
| S25 | ESI+ | 110.07127 | 8-800  | $y = 6.378 \times 10^5 x + 1.735 \times 10^7$ | 0.9988 | 0.2 | 0.7 | 0.5 | 1.7 |
| S26 | ESI+ | 165.13863 | 8-2000 | $y = 2.871 \times 10^5 x + 2.278 \times 10^6$ | 0.9999 | 0.5 | 1.7 | 1.3 | 4.2 |
| S27 | ESI- | 132.04549 | 20-800 | $y = 1.257 \times 10^4 x + 3.867 \times 10^4$ | 0.9997 | 6.5 | 22  | 9.0 | 30  |
| S28 | ESI- | 142.99053 | 8-2000 | $y = 6.981 \times 10^4 x + 1.024 \times 10^5$ | 0.9999 | 1.8 | 5.8 | 4.5 | 15  |
| S29 | ESI- | 159.04515 | 8-2000 | $y = 1.131 \times 10^5 x - 2.425 \times 10^5$ | 0.9999 | 0.3 | 1.0 | 0.8 | 2.5 |
| S30 | ESI+ | 185.10732 | 8-2000 | $y = 3.780 \times 10^5 x + 6.315 \times 10^6$ | 0.9988 | 0.2 | 0.6 | 0.5 | 1.7 |
| S31 | ESI- | 159.04515 | 8-2000 | $y = 1.484 \times 10^5 x + 1.544 \times 10^6$ | 0.9998 | 0.5 | 1.6 | 1.3 | 4.2 |
| S32 | ESI- | 143.05024 | 8-2000 | $y = 1.027 \times 10^5 x - 9.617 \times 10^4$ | 0.9999 | 0.1 | 0.2 | 0.3 | 0.8 |

$y$ : peak area;  $x$ : mass concentration, ng/mL.

\*: Calculated based on the dilution process of test solution I-1, while others solutions were determined through the dilution process of test solution II-1 (where I represents the test solution containing 0.05% D-isoascorbic acid, and II represents the test solution without the addition of 0.05% D-isoascorbic acid). LOD/LOQ ( $\mu\text{g/g}$ ) = LOD/LOQ (ng/mL)  $\times$  500/0.2 (g)

**Table S3** Sample background concentration, addition concentration, recovery, repeatability ( $n = 9$ ) and relative standard deviation (RSD,  $n = 6$ ) of 54 dye components

| Compound ID | Background (ng/mL) | Added (ng/mL) | Recovery* (%)       | Repeatability ( $n=9$ ) (%) | RSD (%)        |
|-------------|--------------------|---------------|---------------------|-----------------------------|----------------|
| A01         | 0                  | 40, 200, 800  | 77.2, 88.5, 83.1    | 6.7                         | 1.5, 1.2, 2.1  |
| A02         | 0                  | 40, 200, 800  | 95.4, 104.7, 87.5   | 8.4                         | 1.4, 1.8, 1.6  |
| A03         | 0                  | 40, 200, 800  | 69.9, 59.0, 51.0    | 14.9                        | 3.4, 3.5, 2.9  |
| A04         | 0                  | 40, 200, 800  | 80.7, 107.7, 97.7   | 12.9                        | 1.3, 1.3, 1.6  |
| A05         | 0                  | 40, 200, 800  | 129.3, 112.2, 113.8 | 8.5                         | 1.7, 1.5, 0.9  |
| A06         | 0                  | 40, 200, 800  | 82.6, 111.9, 100.7  | 13.5                        | 1.1, 1.2, 1.4  |
| A07         | 0                  | 40, 200, 800  | 94.2, 100.3, 112.9  | 8.4                         | 1.2, 1.7, 1.0  |
| A08         | 0                  | 40, 200, 800  | 95.6, 104.7, 84.3   | 9.8                         | 1.8, 1.8, 2.2  |
| A09         | 0                  | 40, 200, 800  | 91.1, 96.0, 106.7   | 7.7                         | 3.3, 1.8, 1.2  |
| A10         | 0                  | 40, 200, 800  | 83.6, 90.3, 94.4    | 6.5                         | 4.2, 1.0, 0.7  |
| A11         | 0                  | 40, 200, 800  | 84.1, 92.8, 100.6   | 8.1                         | 2.7, 1.5, 1.0  |
| A12         | 0                  | 40, 200, 800  | 118.4, 95.9, 109.4  | 9.9                         | 2.8, 4.1, 3.4  |
| A13         | 0                  | 40, 200, 800  | 87.5, 94.7, 103.1   | 7.5                         | 1.8, 1.4, 1.4  |
| A14         | 20.14              | 40, 200, 800  | 96.0, 84.6, 89.2    | 9.8                         | 3.1, 3.8, 7.9  |
| A15         | 0                  | 40, 200, 800  | 88.1, 84.1, 93.7    | 6.0                         | 2.3, 3.2, 1.8  |
| A16         | 0                  | 40, 200, 800  | 68.5, 69.8, 73.4    | 5.5                         | 6.8, 7.0, 6.4  |
| A17         | 0                  | 40, 200, 800  | 85.7, 96.7, 109.0   | 11.2                        | 10.0, 4.8, 2.7 |
| A18         | 0                  | 40, 200, 800  | 97.1, 96.4, 108.9   | 6.6                         | 1.1, 1.4, 1.6  |
| A19         | 0                  | 40, 200, 800  | 94.8, 98.3, 84.3    | 7.6                         | 1.7, 1.1, 0.7  |
| A20         | 0                  | 40, 200, 800  | 86.6, 90.1, 100.4   | 7.7                         | 2.2, 2.0, 2.6  |

|     |       |                |                     |      |               |
|-----|-------|----------------|---------------------|------|---------------|
| A21 | 0     | 40, 200, 800   | 84.5, 89.5, 102.1   | 9.1  | 2.3, 1.9, 1.2 |
| A22 | 0     | 40, 200, 800   | 95.3, 110.3, 111.4  | 8.1  | 4.1, 1.6, 1.2 |
| S01 | 0     | 40, 200, 800   | 87.5, 115.3, 102.0  | 12.4 | 2.3, 1.7, 0.9 |
| S02 | 0     | 40, 200, 800   | 98.5, 100.2, 115.3  | 8.6  | 2.3, 3.2, 1.4 |
| S03 | 31.26 | 40, 200, 800   | 108.3, 122.9, 103.1 | 10.1 | 3.0, 2.4, 3.0 |
| S04 | 0     | 40, 200, 800   | 95.8, 100.5, 106.2  | 5.9  | 9.1, 2.0, 1.1 |
| S05 | 0     | 40, 200, 800   | 101.3, 96.5, 98.3   | 6.5  | 3.4, 3.2, 2.3 |
| S06 | 0     | 40, 200, 800   | 100.0, 98.7, 105.6  | 4.2  | 1.4, 1.5, 0.9 |
| S07 | 0     | 40, 200, 800   | 111.9, 100.6, 107.4 | 5.8  | 6.2, 2.1, 2.3 |
| S08 | 0     | 40, 200, 800   | 87.9, 95.8, 107.7   | 9.9  | 2.2, 1.4, 1.9 |
| S09 | 0     | 40, 200, 800   | 97.3, 96.7, 105.1   | 5.0  | 1.4, 2.1, 1.8 |
| S10 | 0     | 40, 200, 800   | 81.4, 73.3, 91.7    | 14.4 | 5.4, 3.2, 2.9 |
| S11 | 0     | 40, 200, 800   | 95.6, 110.9, 112.9  | 9.7  | 1.9, 1.3, 0.9 |
| S12 | 0     | 40, 200, 800   | 100.1, 103.8, 105.1 | 4.2  | 3.9, 3.6, 1.7 |
| S13 | 0     | 40, 200, 800   | 100.5, 99.9, 108.6  | 5.1  | 4.4, 3.0, 1.5 |
| S14 | 0     | 40, 200, 800   | 89.5, 95.0, 80.6    | 7.8  | 2.3, 0.9, 0.7 |
| S15 | 0     | 40, 200, 800   | 98.3, 102.8, 104.5  | 5.7  | 4.8, 7.9, 5.0 |
| S16 | 0     | 40, 200, 800   | 94.8, 104.4, 112.2  | 7.6  | 2.1, 1.6, 1.0 |
| S17 | 0     | 40, 200, 800   | 101.2, 98.1, 105.2  | 4.0  | 3.2, 2.3, 2.2 |
| S18 | 10.03 | 40, 200, 800   | 74.8, 89.1, 80.6    | 8.8  | 5.5, 4.5, 4.9 |
| S19 | 0     | 160, 800, 3200 | 74.3, 89.9, 96.5    | 11.6 | 5.3, 7.2, 2.4 |
| S20 | 0     | 40, 200, 800   | 111.8, 103.4, 110.6 | 4.8  | 7.1, 8.5, 6.0 |
| S21 | 0     | 40, 200, 800   | 87.5, 105.6, 109.3  | 10.3 | 1.5, 0.9, 0.9 |
| S22 | 0     | 40, 200, 800   | 90.3, 100.1, 102.9  | 6.8  | 0.8, 1.3, 1.6 |
| S23 | 0     | 40, 200, 800   | 94.1, 101.9, 105.8  | 6.7  | 3.0, 2.2, 1.9 |
| S24 | 0     | 40, 200, 800   | 93.1, 99.9, 86.0    | 9.4  | 1.3, 1.7, 0.7 |



|     |   |              |                     |     |               |
|-----|---|--------------|---------------------|-----|---------------|
| S25 | 0 | 40, 200, 800 | 91.6, 105.2, 108.8  | 8.1 | 0.8, 1.0, 0.9 |
| S26 | 0 | 40, 200, 800 | 98.4, 109.3, 113.5  | 7.2 | 1.6, 2.3, 2.1 |
| S27 | 0 | 40, 200, 800 | 88.7, 99.4, 102.6   | 7.4 | 5.6, 1.2, 1.2 |
| S28 | 0 | 40, 200, 800 | 92.6, 102.0, 110.4  | 8.2 | 1.7, 1.4, 0.9 |
| S29 | 0 | 40, 200, 800 | 100.3, 105.8, 111.6 | 5.2 | 1.3, 1.2, 0.7 |
| S30 | 0 | 40, 200, 800 | 97.1, 114.8, 108.3  | 8.0 | 3.6, 4.0, 2.0 |
| S31 | 0 | 40, 200, 800 | 95.8, 106.2, 108.0  | 6.2 | 1.2, 0.6, 1.1 |
| S32 | 0 | 40, 200, 800 | 90.8, 100.4, 106.7  | 7.4 | 1.5, 1.4, 0.9 |

---

\* Recovery = (Found-Background)/Added × 100%.

**Table S4** Comparison of metrics of the determination methods for hair dye components

| Target substance                                                              | Method                              | Run time (min)   | Range                        | LOD                          | LOQ                           | Reference |
|-------------------------------------------------------------------------------|-------------------------------------|------------------|------------------------------|------------------------------|-------------------------------|-----------|
| 32 hair dye components                                                        | HPLC-DAD                            | 105 <sup>a</sup> | 10–500 mg L <sup>-1</sup>    | 10–100 µg g <sup>-1</sup>    | 32–300 µg g <sup>-1</sup>     | 1         |
|                                                                               | LC-MS/MS (qualitative confirmation) | 46 <sup>b</sup>  | /                            | 0.05–1 ng                    | /                             |           |
| 15 hair dye components                                                        | HPLC-DAD                            | 40               | 5–500 mg L <sup>-1</sup>     | 10–80 µg g <sup>-1</sup>     | 28–200 µg g <sup>-1</sup>     | 2         |
|                                                                               | LC-MS/MS (qualitative confirmation) | 20               | /                            | 0.03 ng                      | /                             |           |
| 13 components in oxidative hair dyes<br>PPD, 4-MAP, OAP, PAP, OPD, and<br>MAP | HPLC-DAD                            | 28               | 2–500 mg L <sup>-1</sup>     | 200–2000 ng mL <sup>-1</sup> | Not reported                  | 3         |
|                                                                               | HPLC-DAD                            | 25               | 1.25–40 mg L <sup>-1</sup>   | 2.0–7.4 ng                   | 6.5–24.5 ng                   | 4         |
| 22 dye components                                                             | GC-MS                               | 45               | 5–500 mg L <sup>-1</sup>     | 15–35 µg g <sup>-1</sup>     | 47–115 µg g <sup>-1</sup>     | 5         |
| 17 components in oxidative hair dyes                                          | GC-MS                               | 25               | 0.5–1000 mg L <sup>-1</sup>  | 2–380 µg g <sup>-1</sup>     | 7.5–1267.5 µg g <sup>-1</sup> | 6         |
| 11 dye components                                                             | LC-MS/MS                            | 12               | 0.05–40 mg L <sup>-1</sup>   | 0.15–10 µg g <sup>-1</sup>   | 0.5–40 µg g <sup>-1</sup>     | 7         |
| 5 semi-permanent hair dye<br>components                                       | LC-MS/MS                            | 10               | 0.001–0.2 mg L <sup>-1</sup> | 0.66–20 ng mL <sup>-1</sup>  | 2.0–63 ng mL <sup>-1</sup>    | 8         |
| 11 phenols and anilines in oxidative<br>hair dyes                             | LC-MS/MS                            | 16               | 0.04–1.0 mg L <sup>-1</sup>  | 1.2–9.4 µg g <sup>-1</sup>   | Not reported                  | 9         |
| 54 dye components                                                             | LC-HRMS                             | 15               | 0.008–8 mg L <sup>-1</sup>   | 0.1–23.5 ng mL <sup>-1</sup> | 0.2–78.1 ng mL <sup>-1</sup>  | This work |

Notes: <sup>a</sup> Two chromatographic conditions, with run times of 55 and 50 minutes, are necessary for determination. <sup>b</sup> Positive ion mode and negative ion mode are required for determination separately, each with a run time of 23 minutes.

DAD: Diode Array Detector, PPD: *p*-Phenylenediamine, 4-MAP: 4-Methylaminophenol sulfate, OAP: *o*-aminophenol, PAP: *p*-aminophenol, OPD: *o*-phenylenediamine, MAP: *m*-Aminophenol, HRMS: high-resolution mass spectrometry

## References

1. National Medical Products Administration, The inspection methods for 32 components, including p-Phenylenediamine, in cosmetics, <https://www.nmpa.gov.cn/directory/web/nmpa/images/1614678355048063969.doc>, (accessed Aug 6th, 2024)
2. National Medical Products Administration, The inspection methods for 15 raw materials including 2-amino-4-hydroxyethylaminoanisoole sulfate in cosmetics, <https://www.nmpa.gov.cn/directory/web/nmpa/images/1693213371906014802.doc>, (accessed Aug 6th, 2024)
3. Y. Lai, H. H. Wang, Q. M. Dong, H. X. Chen, R. Lin and Y. P. Cai, *J. Cosmet. Sci.*, 2012, **63**, 321-331, <https://pubmed.ncbi.nlm.nih.gov/23089354/>.
4. Y.-C. Yeh, H.-J. Wu, W.-S. Huang, C.-C. Lin, Y.-P. Chen, M.-C. Tzou and J.-C. Tsai, *J. AOAC. Int.*, 2019, **94**, 650-654, <https://doi.org/10.1093/jaoac/94.2.650>.
5. P. Zhang, K. Li, J. Zhou, W. Han and Y. He, *Se Pu*, 2024, 1-6, <https://doi.org/10.3724/SP.J.1123.2023.11018>.
6. Y. Lai, H. X. Chen, R. Lin, H. H. Wang, Q. M. Dong and Z. P. Huang, *Chem. J. Chin. Univ.*, 2011, **32**, 2286-2292.
7. Y.-X. Gu, L.-S. Chen and L. Nie, *J. Chromatogr. Sci.*, 2023, **00**, 1-9, <https://doi.org/10.1093/chromsci/bmad071>.
8. J. H. Franco, B. F. da Silva and M. V. B. Zanoni, *Anal. Methods*, 2020, **12**, 5415-5423, <https://doi.org/10.1039/D0AY01395A>.
9. C. Y. Shao, T. Qin, D. Z. Sun, J. Liu and Y. W. Shao, *Chin. J. Anal. Chem.*, 2014, **42**, 781-782, <https://doi.org/10.3724/SP.J.1096.2014.30843>.
